# Supplementary material for: Nucleosomes influence multiple steps during replication initiation
Source: eLife journal article supplement (doi:10.7554/elife.22512), 2017-03-21
Supplement: supp [file elife-22512-supp-v1.zip]

Archive with 20 entries (20 files):
- elife_poa_e22512_Figure_4_Figure_Supplement_2.pdf
- elife_poa_e22512_Supplementary_File_1B.docx
- elife_poa_e22512_Figure_5_Figure_Supplement_4.pdf
- elife_poa_e22512_Figure_3_source_data_1.xlsx
- elife_poa_e22512_Figure_3_source_data_1.xlsx
- elife_poa_e22512_Figure_2_figure_supplement_1_source_data_1.xlsx
- elife_poa_e22512_Figure_5_Figure_Supplement_2.pdf
- elife_poa_e22512_Figure_1_Figure_Supplement_2.pdf
- elife_poa_e22512_Figure_3_Figure_Supplement_1.pdf
- elife_poa_e22512_Supplementary_File_1A.docx
- elife_poa_e22512_Figure_2_Figure_Supplement_2.pdf
- elife_poa_e22512_Figure_5_Figure_Supplement_1.pdf
- elife_poa_e22512_Figure_2_Figure_Supplement_1.pdf
- elife_poa_e22512_Figure_1_Figure_Supplement_1.pdf
- elife_poa_e22512_Figure_4_Figure_Supplement_1.pdf
- elife_poa_e22512_Figure_1_Figure_Supplement_3.pdf
- elife_poa_e22512_Figure_2_figure_supplement_1_source_data_2.xlsx
- elife_poa_e22512_Additional_figure_for_reviewers.pdf
- elife_poa_e22512_Figure_5_Figure_Supplement_3.pdf
- elife_poa_e22512_Figure_4_figure_supplement_1_source_data_1.xlsx
