# Supplementary material for: Nucleosomes influence multiple steps during replication initiation
Source: eLife journal article supplement (doi:10.7554/elife.22512), 2017-03-21
Supplement: supp [file elife-22512-supp-v1.zip › elife_poa_e22512_Figure_2_figure_supplement_1_source_data_1.xlsx]

## Sheet: Sheet1
	Figure 2-figure supplement 1C ( right panel)
	ISW1a	SWI/SNF	RSC
	100	94.3831	90.1532
	95	101.595	118.894
	90	71.9966	94.8907
