# Supplementary material for: Nucleosomes influence multiple steps during replication initiation
Source: eLife journal article supplement (doi:10.7554/elife.22512), 2017-03-21
Supplement: supp [file elife-22512-supp-v1.zip › elife_poa_e22512_Figure_2_figure_supplement_1_source_data_2.xlsx]

## Sheet: Sheet1
	Figure 2-figure supplement 3 (left panel)
	ISW1a	ISW1b	ISW2	Chd1	INO80
	106.346	66.0372	15.2432	46.8456	69.1957
	97.5923	70.3163	14.4563	37.4251	50.442
	90.2344	69.2198	19.5216	43.0402	64.6827
