# Supplementary material for: Nucleosomes influence multiple steps during replication initiation
Source: eLife journal article supplement (doi:10.7554/elife.22512), 2017-03-21
Supplement: supp [file elife-22512-supp-v1.zip › elife_poa_e22512_Figure_3_source_data_1.xlsx]

## Sheet: Sheet1
	Figure 3D
	ISW1a+DDK	SWI/SNF+DDK	RSC+DDKj
	111.476	24.5442	12.3247
	101.32	34.403	49.1385
	88.1607	34.8837	15.222
