# Supplementary material for: Nucleosomes influence multiple steps during replication initiation
Source: eLife journal article supplement (doi:10.7554/elife.22512), 2017-03-21
Supplement: supp [file elife-22512-supp-v1.zip › elife_poa_e22512_Figure_3_source_data_1.xlsx]

## Sheet: Sheet1
	Figure 3C
	ISW1a+DDK	ISW1b+DDK	ISW2+DDK	INO80+DDK	Chd1+DDK
	96	84.1109	11.9979	65.5641	43.3509
	106	74.1663	24.5558	76.3688	35.0286
	105	93.3118	20.8878	82.0164	38.3473
