# Supplementary material for: Nucleosomes influence multiple steps during replication initiation
Source: eLife journal article supplement (doi:10.7554/elife.22512), 2017-03-21
Supplement: supp [file elife-22512-supp-v1.zip › elife_poa_e22512_Figure_4_figure_supplement_1_source_data_1.xlsx]

## Sheet: Sheet1
	Figure 4-figure supplement 1-sourse data 1
	ISW1a+DDK	SWI/SNF+DDK	RSC+DDK
	100	22.8244	35.8604
	124.541	21.6034	41.0027
	75.4615	35	11.9819
