# Supplementary figures and images for: Nucleosomes influence multiple steps during replication initiation
Source: eLife journal article supplement (doi:10.7554/elife.22512), 2017-03-21

**A**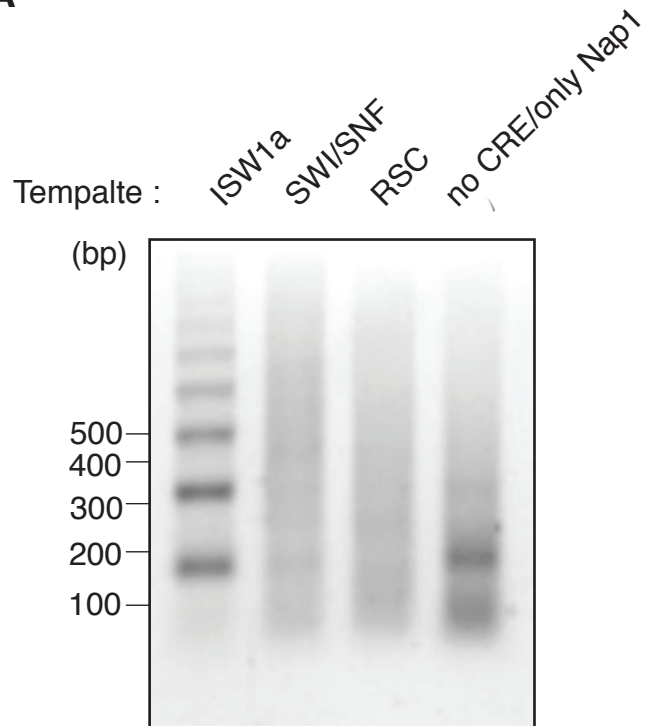**B**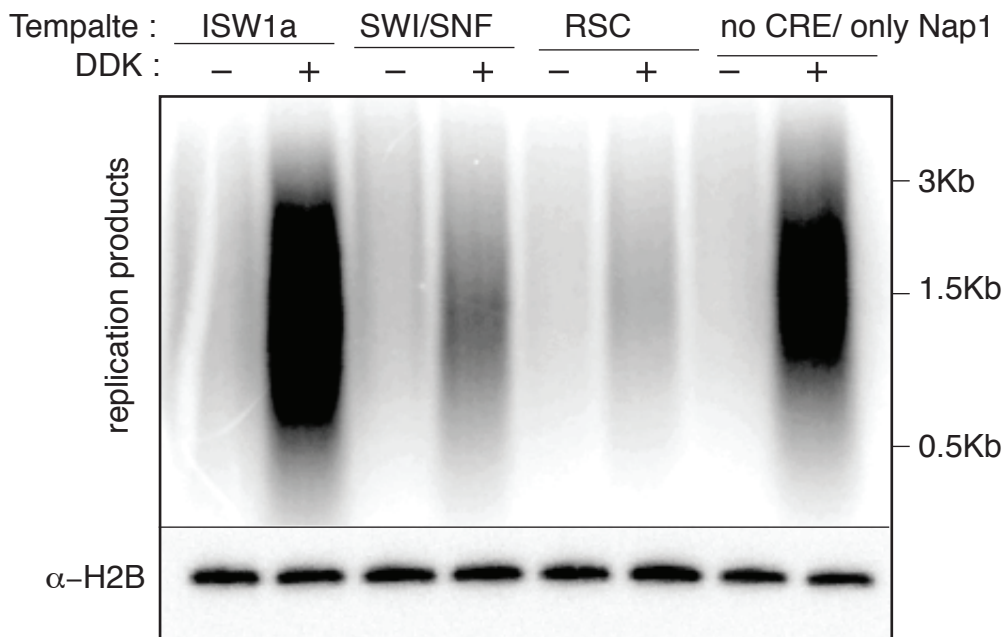

Supplement: supp [file elife-22512-supp-v1.zip › elife_poa_e22512_Figure_4_Figure_Supplement_2.pdf]

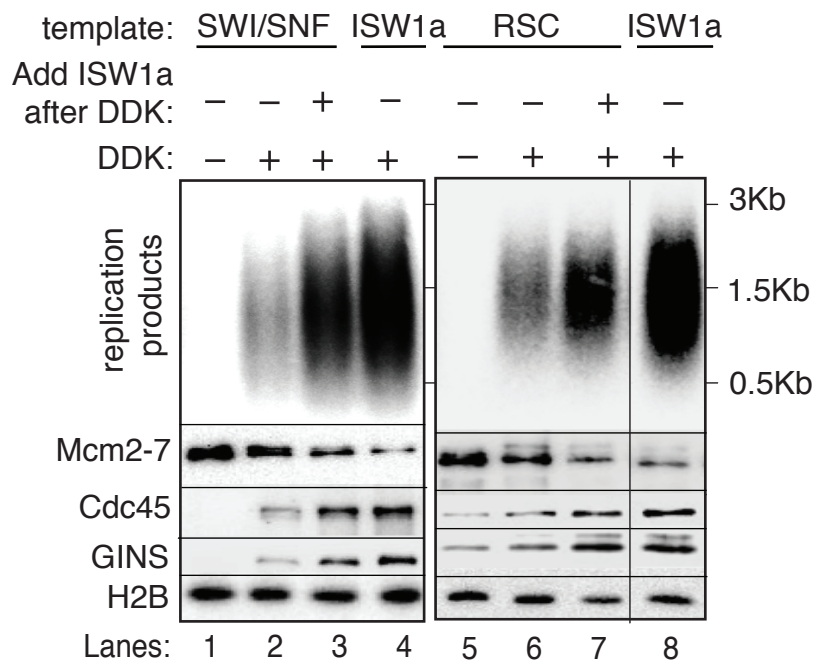

Supplement: supp [file elife-22512-supp-v1.zip › elife_poa_e22512_Figure_5_Figure_Supplement_4.pdf]

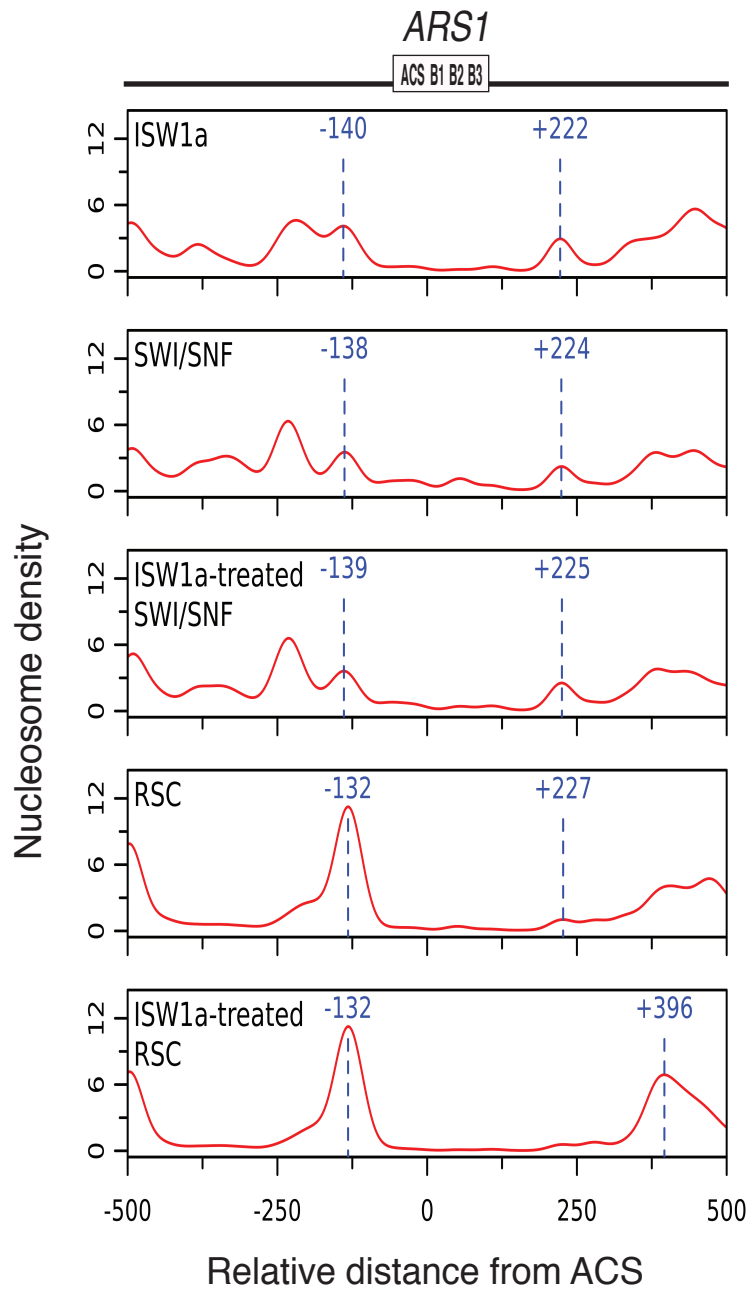

Supplement: supp [file elife-22512-supp-v1.zip › elife_poa_e22512_Figure_5_Figure_Supplement_2.pdf]

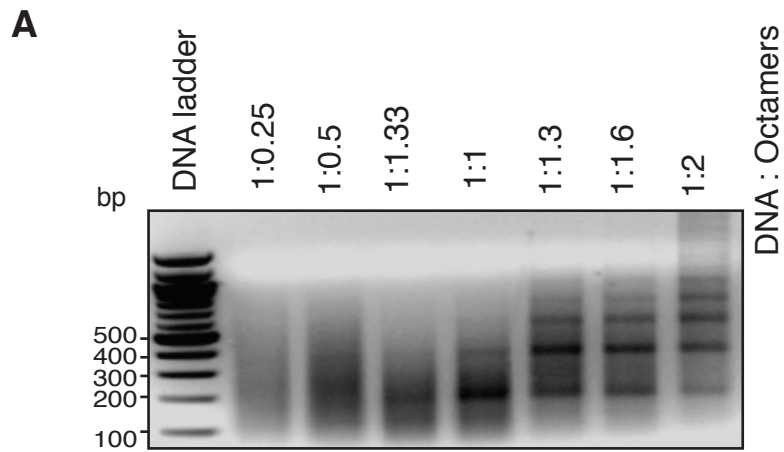

**B**

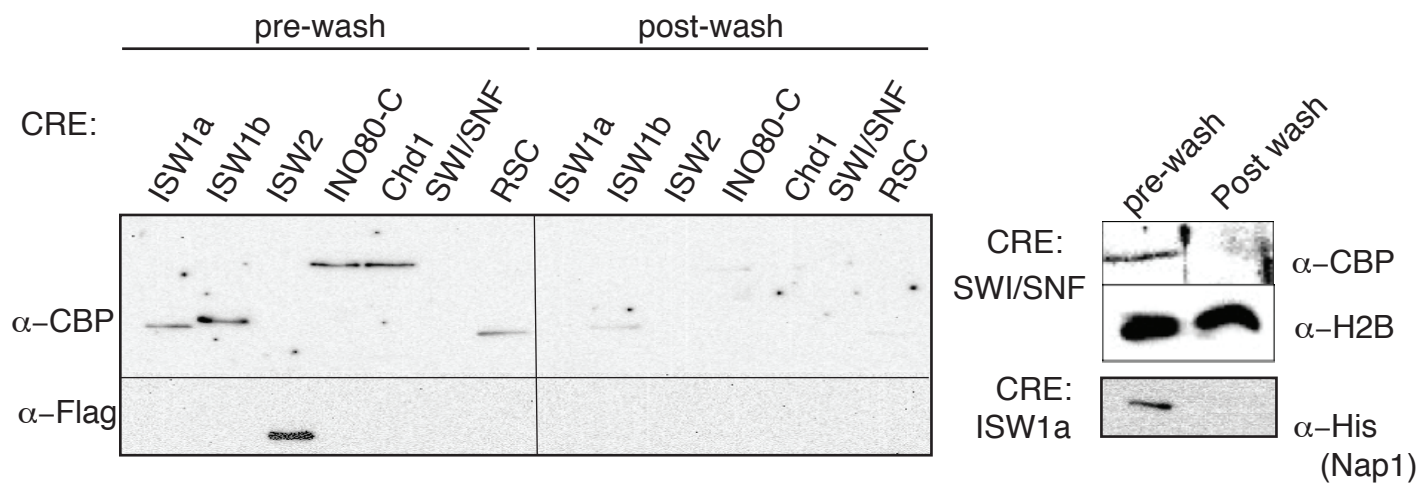

Supplement: supp [file elife-22512-supp-v1.zip › elife_poa_e22512_Figure_1_Figure_Supplement_2.pdf]

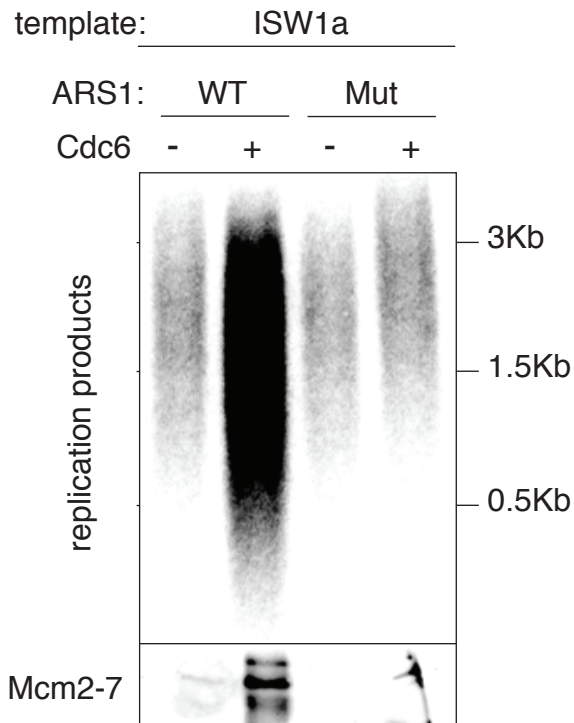

Supplement: supp [file elife-22512-supp-v1.zip › elife_poa_e22512_Figure_3_Figure_Supplement_1.pdf]

**A**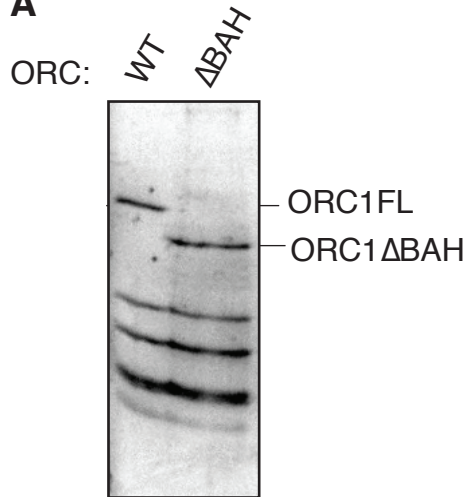**B**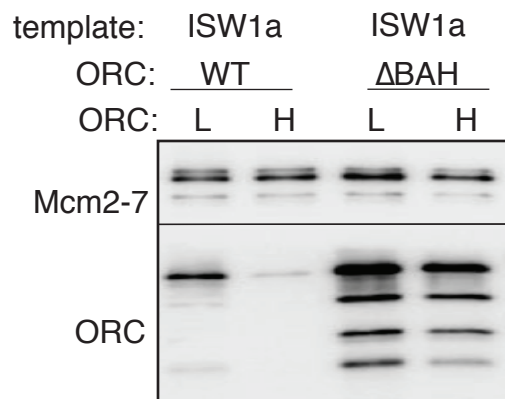**C**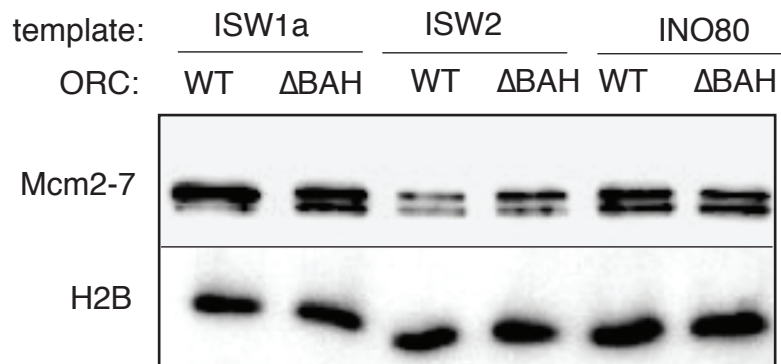**E**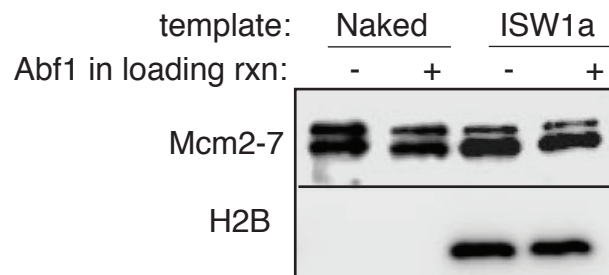**D**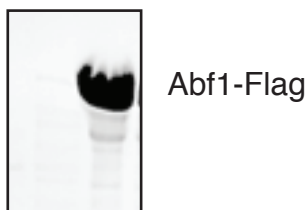**F**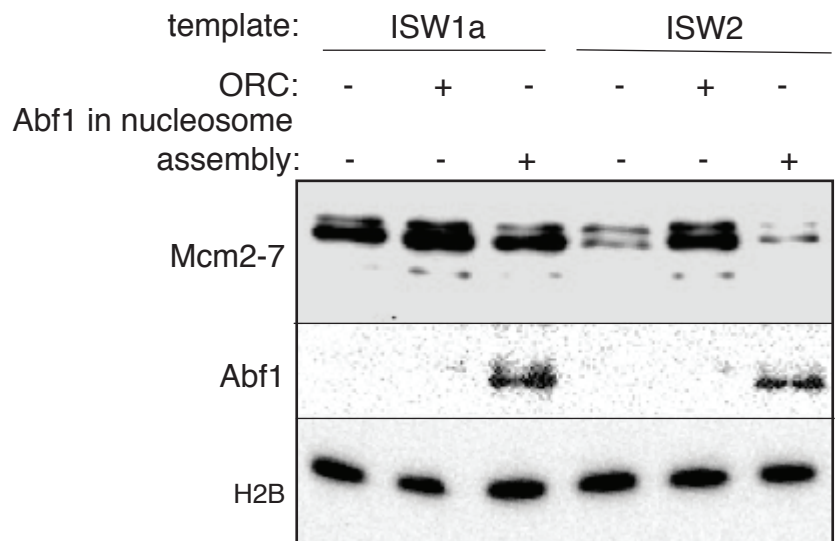

Supplement: supp [file elife-22512-supp-v1.zip › elife_poa_e22512_Figure_2_Figure_Supplement_2.pdf]

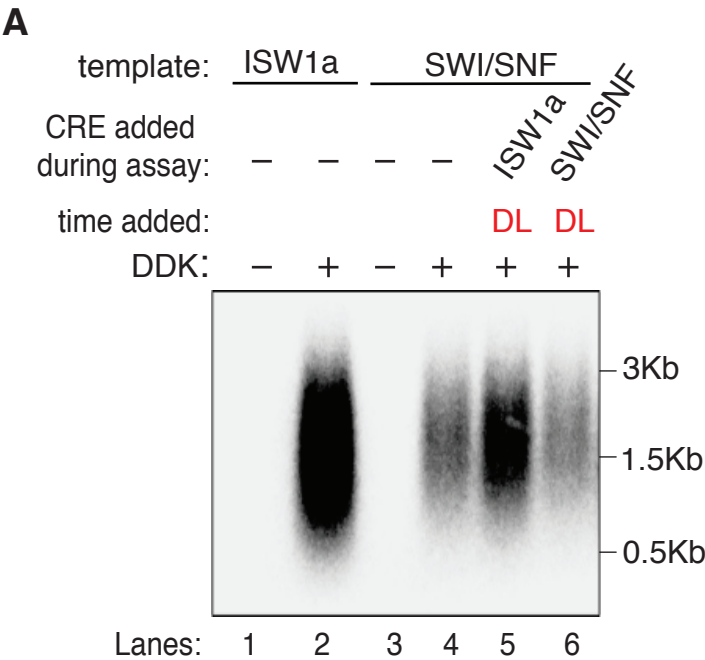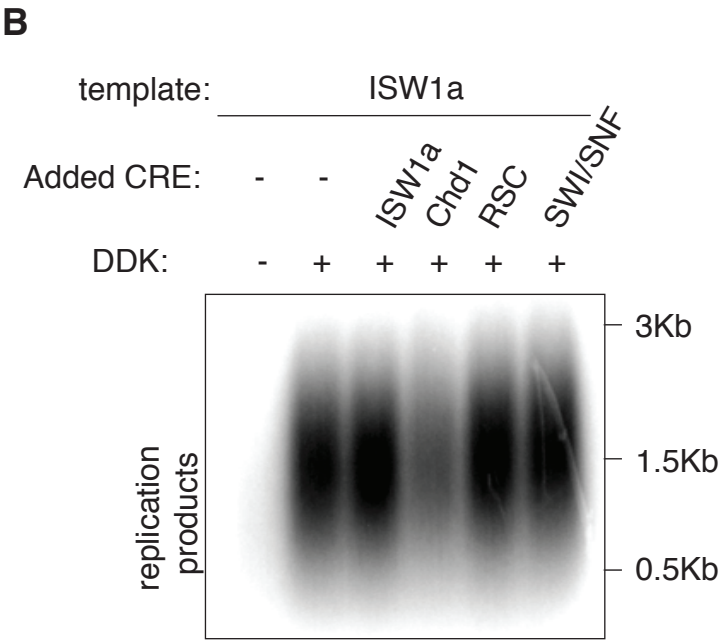

Supplement: supp [file elife-22512-supp-v1.zip › elife_poa_e22512_Figure_5_Figure_Supplement_1.pdf]

**A**

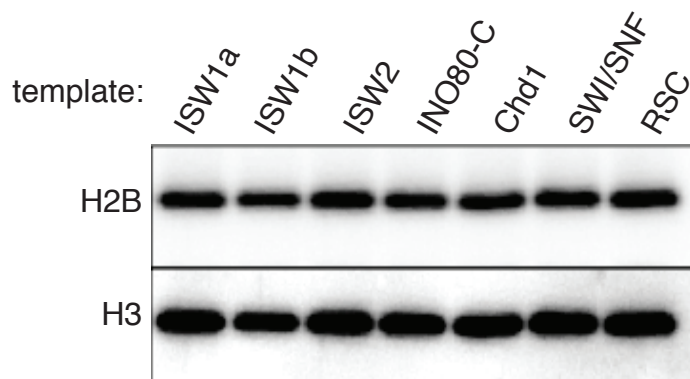

**B**

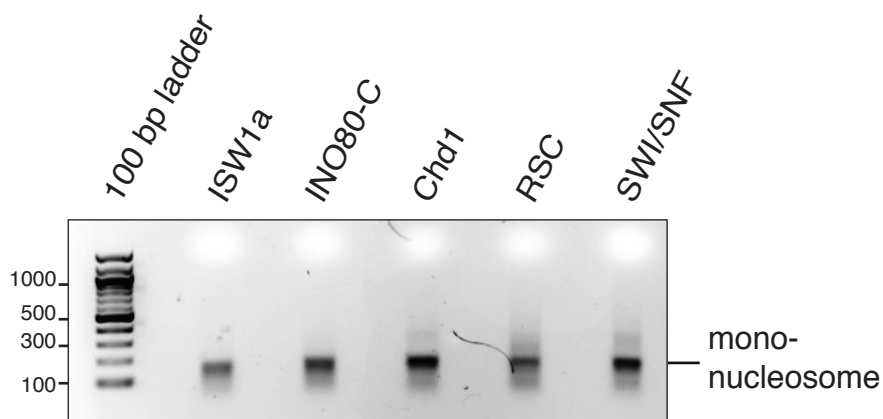

**C**

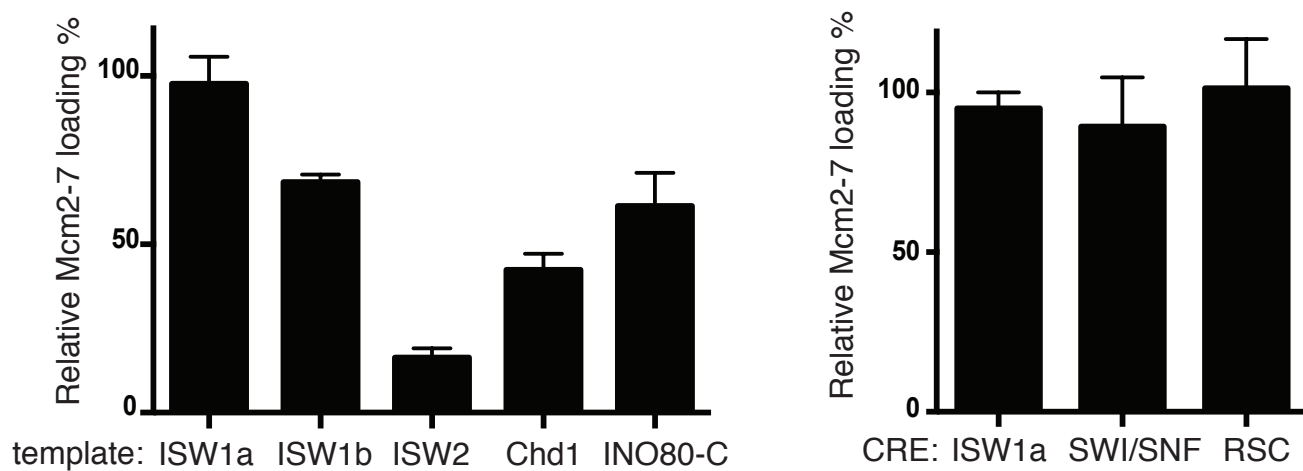

Supplement: supp [file elife-22512-supp-v1.zip › elife_poa_e22512_Figure_2_Figure_Supplement_1.pdf]

**A**

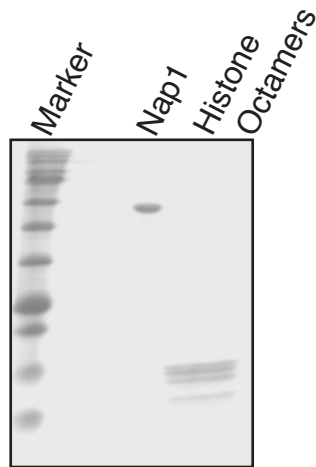

**B**

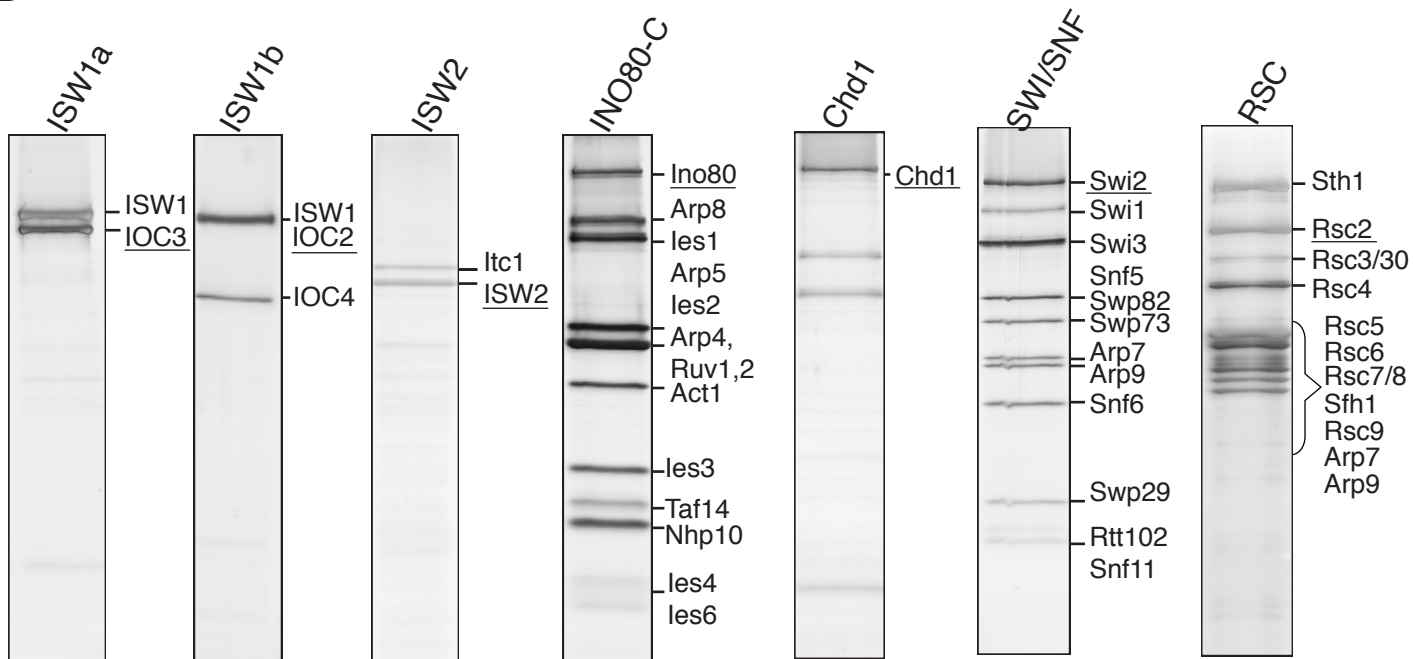

Supplement: supp [file elife-22512-supp-v1.zip › elife_poa_e22512_Figure_1_Figure_Supplement_1.pdf]

**A**

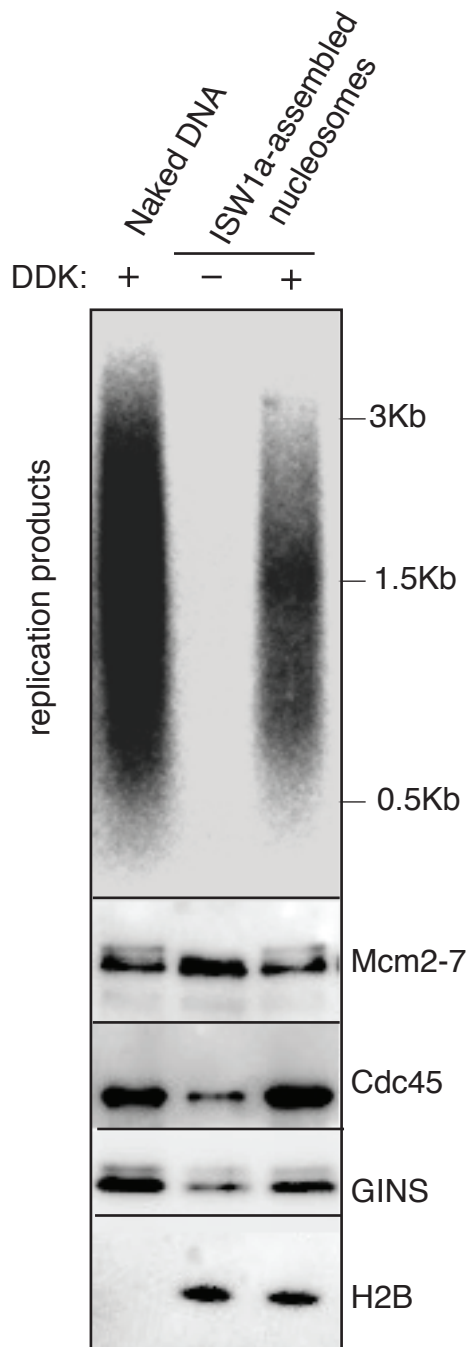

**B**

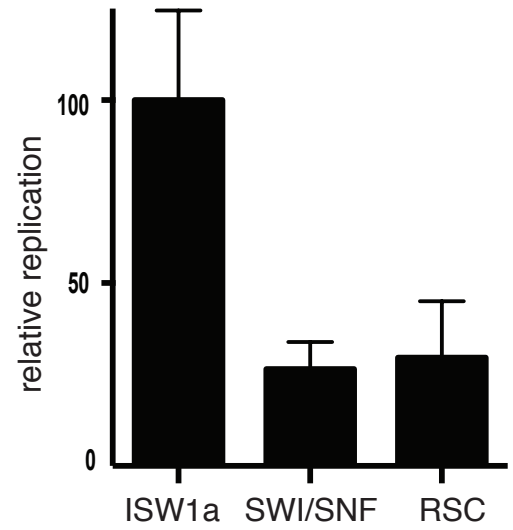

Supplement: supp [file elife-22512-supp-v1.zip › elife_poa_e22512_Figure_4_Figure_Supplement_1.pdf]

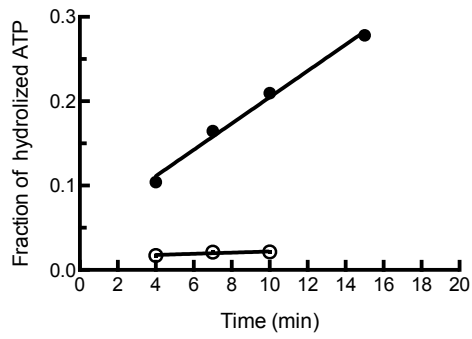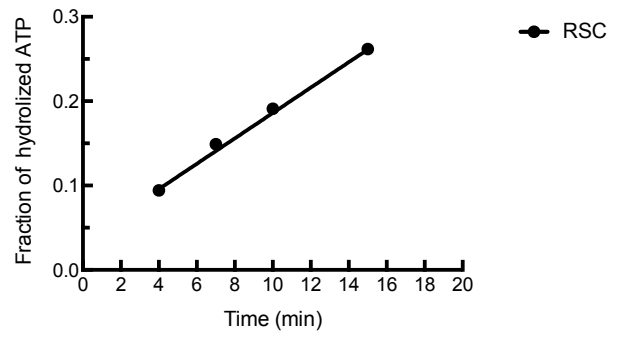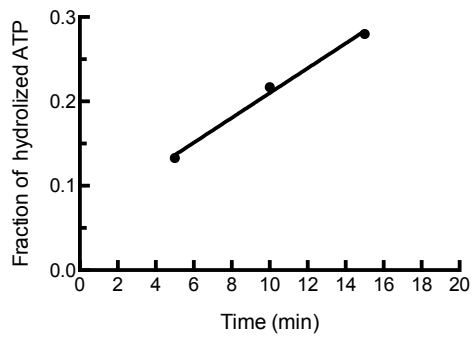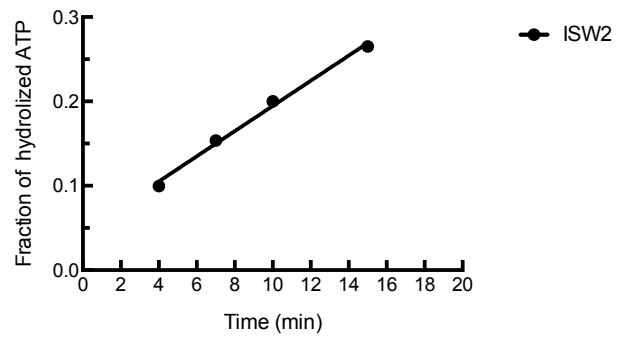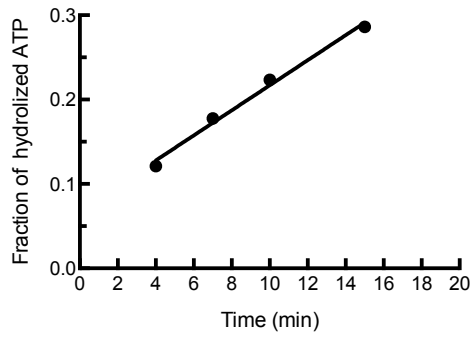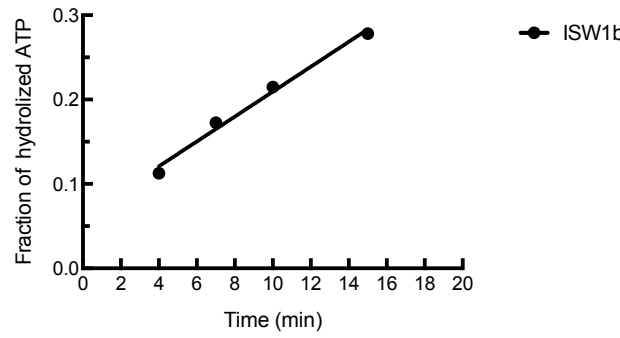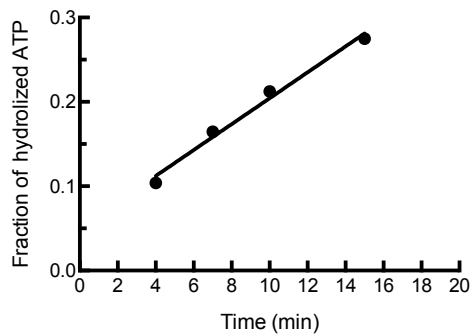

Supplement: supp [file elife-22512-supp-v1.zip › elife_poa_e22512_Figure_1_Figure_Supplement_3.pdf]

template: ISW1a

add at initiationst sep: - - Nap1 FACT

DDK: - + + +

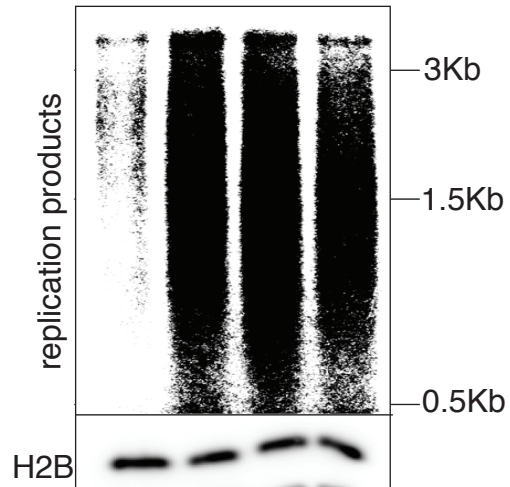

Supplement: supp [file elife-22512-supp-v1.zip › elife_poa_e22512_Additional_figure_for_reviewers.pdf]

**A**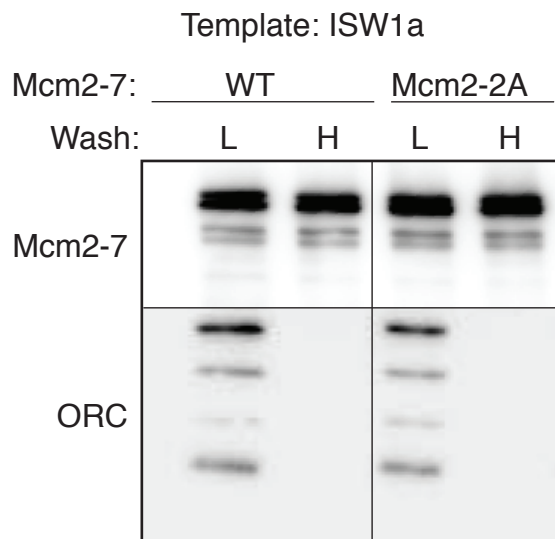**B**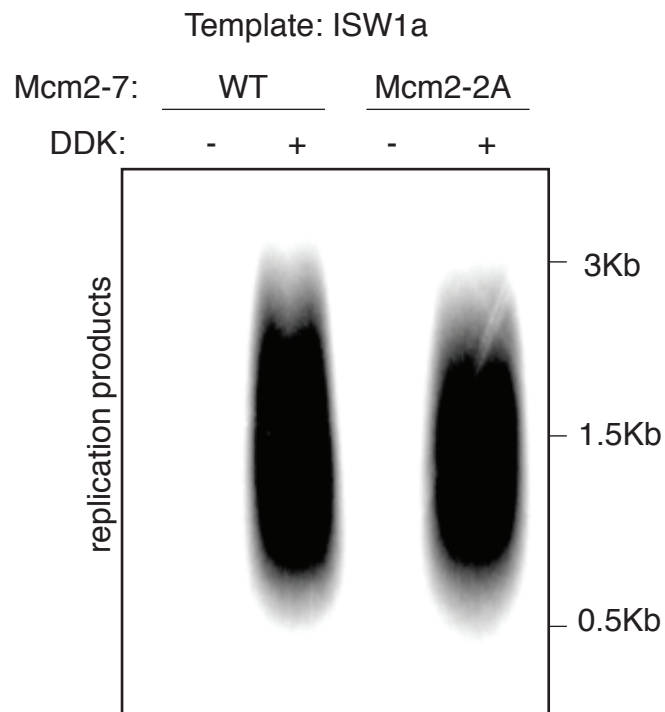

Supplement: supp [file elife-22512-supp-v1.zip › elife_poa_e22512_Figure_5_Figure_Supplement_3.pdf]
